# Supplementary material
Source: PubMed Central journal article supplement (PMC2075224)
Supplement: tjp0581-0175-SD1.pdf [file tjp0581-0175-SD1.pdf]

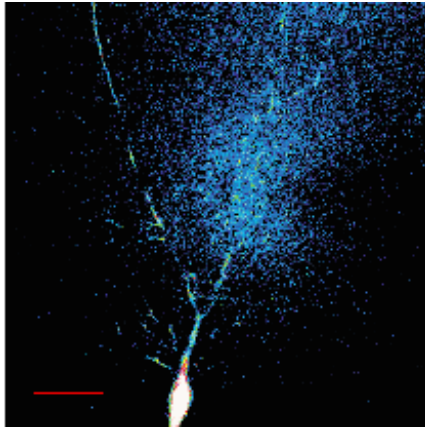

**Supplemental Figure 1.** Local application of DTX to the proximal dendrite. A CA1 pyramidal neuron was patched and filled with 200  $\mu\text{M}$  Fluo4 and 10  $\mu\text{M}$  Alexa 594. DTX was applied in a solution containing 40  $\mu\text{M}$  Alexa 594. This confocal image acquired below the level of both the patch and the application pipette confirms that the DTX application (blue cloud) is limited to the proximal dendrite. (Calibration bar: 50  $\mu\text{m}$ ).
